# Supplementary material
Source: Elsevier journal article supplement (https://cris.unibo.it/retrieve/e1dcb339-a4d1-7715-e053-1705fe0a6cc9/mmc1.pdf)
Supplement: mmc1 [file mmc1.pdf]

## SUPPLEMENTARY MATERIAL

### TABLE OF CONTENTS

Page 2-4: **Supplementary appendix.**

Page 5-7: **Supplementary Table S1;** List of the analyzed cell subsets.

Page 8: **Supplementary Table S2;** Plasma cytokines levels in MN patients and in healthy controls

Page 8: **Supplementary Table S3;** PhIP-seq hits for autoantigens and viral antigens.

## Definitions of clinical outcomes

Clinical remission for membranous nephropathy (MN) was defined according to 2012 Kidney Disease: Improving Global Outcomes (KDIGO clinical practice guideline for glomerulonephritis<sup>1</sup>) as 1) complete in case of urinary protein excretion less than 500 mg per day or 500 mg/g creatinine; 2) partial in case of urinary protein excretion  $< 3.5$  g per day or 3500 mg/g creatinine and  $\geq 500$  mg/g creatinine with at least 50% reduction compared to baseline. Antibody depletion was defined as complete disappearance of antibodies in PLA<sub>2</sub>R-Ab positive patients.

## Complete-cases datasets and collinear cell subsets

The analyses excluded 5 healthy controls because of missing data, and 39 cell subsets because of redundancy. Out of the original 68 cell subsets, 11 were excluded because they were missing in over 10% of patients. Among the remaining 57 cell subsets, we identified those that were collinear using the Stata built-in command `_rmcoll`. To visualize the strength of their correlation, we used a correlation plot (**Supplementary Figure S1**). Based on the degree of redundancy evaluated by statistical collinearity and correlation as well as by background knowledge, we selected 30 cell subsets (73 subjects) for the main analyses (“main-analyses reduced dataset”).

To check for consistency of our findings, we created one additional data set in which we kept most of the collinear cell subsets (52 cell subsets in total, 71 subjects; **Supplementary Table S1**), and used this dataset for a sensitivity analysis; in this setting, we used LASSO (least absolute shrinkage and selection operator). LASSO is meant for high-dimensional models having too many potential covariates (possibly highly correlated) for the sample size at hand. Among the 52 cell subsets, we used LASSO to identify which predicted MN as the dependent dichotomous variable (=1 if MN and 0 if Healthy controls or CKD, pooled) via logistic regression. The LASSO coefficient path (**Supplementary Figure S3**) carried out on 52 cell subsets and 71 subjects, confirmed the main findings obtained from the main-analyses reduced dataset (30 cell subsets, and 73 subjects). An

additional sensitivity analysis was performed by calculating variable importance via random forest on the main-analyses reduced dataset (30 cell subsets, and 73 subjects) (**Supplementary Figure S2**, and see main body of the manuscript for details).

### **Quantification of anti-PLA<sub>2</sub>R antibodies**

To quantify anti-PLA<sub>2</sub>R Ab levels in the cell supernatants, we used a commercial quantitative ELISA assay (EUROIMMUN AG) for the IgG-specific isotype of anti-PLA<sub>2</sub>R, according to manufacturer instructions. Calibrators with anti-PLA<sub>2</sub>R concentration of 2, 100, 500, and 1500 RU per ml and positive and negative controls were added to the microplates. Optical density was read at 450 nm using a microplate photometer (Multiskan FC, ThermoFisher Scientific Inc). Serums anti-PLA<sub>2</sub>R IgG antibodies were assessed similarly at the same institutions where patients were enrolled.

### **Analyses of PhIP-seq results**

To analyze PhIP-seq results, the counts per million (CPM) matrix indicating the fraction of reads aligning to each phage clone in each sample was calculated using Kallisto.<sup>2</sup> The CPM matrix was corrected for batch effects using the phip-stat (<https://github.com/lasersonlab/hip-stat>) software with the command “`hip clipped-factorization-model --no-normalize-to-reads-per-million -i cpm.tsv -o factorized.tsv`”. Hits were called using the phip-stat command “`hip call-hits -i factorized.tsv -o hits.tsv --fdr 0.05 --normalize-to-reads-per-million never --reference-quantile 1.0`”. Differences in the total PhIP-seq hit counts between MN, CKD, and HC samples were assessed using Welch’s t-test. To search for enrichments in hits against particular genes (human90) or viruses (virscan) in the MN patients, hits were grouped according to gene, pfam identifiers,<sup>3</sup> and viral family, genus, species, and subspecies. Total hits for each group (e.g. “viral family: Herpesviridae”) were tested for enrichment in MN vs. CKD, MN vs. HC, and MN vs. CKD + HC using Fisher’s exact test, with the false discovery rate controlled at alpha=0.05 using the Benjamini/Hochberg procedure. To visualize overall inter-sample similarity (Jaccard similarity of the hits for each pair of samples), t-distributed

Stochastic Neighbor Embedding<sup>4</sup> embeddings were calculated using the t-SNE routine in scikit-learn.<sup>5</sup>

## SUPPLEMENTARY REFERENCES

1. Chapter 7: Idiopathic membranous nephropathy. *Kidney Int Suppl (2011)*, 2: 186-197, 2012.
2. Bray, NL, Pimentel, H, Melsted, P, Pachter, L: Near-optimal probabilistic RNA-seq quantification. *Nat Biotechnol*, 34: 525-527, 2016.
3. Finn, RD, Bateman, A, Clements, J, Coggill, P, Eberhardt, RY, Eddy, SR, Heger, A, Hetherington, K, Holm, L, Mistry, J, Sonnhammer, ELL, Tate, J, Punta, M: Pfam: the protein families database. *Nucleic Acids Res*, 42: D222-D230, 2014.
4. van der Maaten, L, Hinton, GE: Visualizing data using t-SNE. *J Mach Learn Research*, 9, 2008.
5. Pedregosa, F, Varoquaux, G, Gramfort, A, Michel, V, Thirion, B, Grisel, O, Blondel, M, Prettenhofer, P, Weiss, R, Dubourg, V: Scikit-learn: Machine learning in Python. *Journal of machine learning research*, 12: 2825-2830, 2011.

**Supplementary Table S1. Analyzed cell subsets.**

| <b>Subset name</b>                         | <b>Abbreviation</b>   | <b>Markers</b>                                      | <b>Parent Population</b>             |
|--------------------------------------------|-----------------------|-----------------------------------------------------|--------------------------------------|
| <i>Total B cells</i>                       | Bcell                 | CD3-CD56-CD19+                                      | Singlets                             |
| <i>Naïve/transitional B cells</i>          | NaiveB                | CD3-CD56-CD19+IgD+CD27-                             | CD3-CD56-CD19+                       |
| <i>Unswitched memory B cells</i>           | UnsBmem               | CD3-CD56-CD19+IgD+CD27+                             | CD3-CD56-CD19+                       |
| <i>Switched memory B cells</i>             | SwtBmem               | CD3-CD56-CD19+ IgD-CD27+                            | CD3-CD56-CD19+                       |
| <i>Double negative memory B cells</i>      | DNBmem                | CD3-CD56-CD19+IgD-CD27-                             | CD3-CD56-CD19+                       |
| <i>T3 B cells</i>                          | T3Bcell               | CD3-CD56-CD19+IgD+CD27-CD24lowCD38low               | CD3-CD56-CD19+                       |
| <i>T1 B cells</i>                          | T1Bcell               | CD3-CD56-CD19+IgD+CD27-<br>CD24+highCD38+high       | CD3-CD56-CD19+                       |
| <i>T2 B cells</i>                          | T2Bcell               | CD3-CD56-CD19+IgD+CD27-CD24intCD38int               | CD3-CD56-CD19+                       |
| <i>Switched/resting B cells</i>            | SwtBrest              | CD3-CD56-CD19+IgD-CD27+CD24+CD95-<br>CD21+          | CD3-CD56-CD19+                       |
| <i>Switched/activated B cells</i>          | SwtBact               | CD3-CD56-CD19+IgD-CD27+CD24-<br>CD95+CD21-          | CD3-CD56-CD19+                       |
| <i>Double negative B cells</i>             | CD21+DNBcell          | CD3-CD56-CD19+IgD-CD27-CD21+CD95-                   | CD3-CD56-CD19+                       |
| <i>T1+T2 B cells</i>                       | T1+T2 B cells         | CD3-CD56-CD19+IgD+CD27-<br>CD24int/highCD38int/high | CD3-CD56-CD19+                       |
| <i>B<sub>regs</sub></i>                    | B <sub>REG</sub>      | CD3-CD56-CD19+CD25+highCD71+high                    | CD3-CD56-CD19+                       |
| <i>Ab secreting B cells_1</i>              | AbBcell_1             | CD3-CD56-CD19+CD38+CD27+                            | CD3-CD56-CD19+                       |
| <i>Ab secreting B cells_2</i>              | AbBcell_2             | CD3-CD56-CD19+CD38+highCD27+high                    | CD3-CD56-CD19+                       |
| <i>Plasma cell_1</i>                       | PC-1                  | CD3-CD56-<br>CD19+CD38+highCD27+highCD138+          | CD3-CD56-<br>CD19+CD38+highCD27+high |
| <i>Plasmablast_1</i>                       | PB-1                  | CD3-CD56-<br>CD19+CD38+highCD27+highCD138-          | CD3-CD56-<br>CD19+CD38+highCD27+high |
| <i>Plasma cell_2</i>                       | PC-2                  | CD3-CD56-<br>CD19+CD38+highCD27+highCD138+          | CD3-CD56-CD19+                       |
| <i>Plasmablast_2</i>                       | PB-2                  | CD3-CD56-<br>CD19+CD38+highCD27+highCD138-          | CD3-CD56-CD19+                       |
| <i>Plasma cell_3</i>                       | PC-3                  | CD138-CD38high                                      | Singlets                             |
| <i>Plasmablast_3</i>                       | PB-3                  | CD138+CD38high                                      | Singlets                             |
| <i>Plasma cell_4</i>                       | PC-4                  | CD3-CD56-CD19+CD38+highCD27+high                    | CD3-CD56-CD19+                       |
| <i>IL17+ B cells</i>                       | IL17Bcell             | CD19+IL17+                                          | CD19+                                |
| <i>IFN<math>\gamma</math>+ B cells</i>     | IFN $\gamma$ Bcell    | CD19+IFN $\gamma$ +IL4-                             | CD19+                                |
| <i>IFN<math>\gamma</math>+IL4+ B cells</i> | IFN $\gamma$ IL4Bcell | CD19+IFN $\gamma$ +IL4+                             | CD19+                                |
| <i>IL4+ B cells</i>                        | IL4Bcell              | CD19+IFN $\gamma$ -IL4+                             | CD19+                                |
| <i>Activated lymphocytes</i>               | Active_Lymph          | CD38high                                            | Singlets                             |
| <i>Memory B cells</i>                      | Bmem                  | CD3-CD56-CD19+CD21-                                 | CD3-CD56-CD19+                       |

|                                                |                     |                                           |                       |
|------------------------------------------------|---------------------|-------------------------------------------|-----------------------|
| <i>Activated B cells</i>                       | Bact                | CD3-CD56-CD19+IgD-CD27-CD21+CD95-         | CD3-CD56-CD19+        |
| <i>Naïve CD4 T cells_1</i>                     | NaiveCD4-1          | CD8-CD4+CD45RA+CD27+                      | CD8-CD4+              |
| <i>Effector CD4 T cells</i>                    | CD4Eff              | CD8-CD4+CD45RO+CD27-                      | CD8-CD4+              |
| <i>Central Memory CD4 T cells</i>              | CD4Mem              | CD8-CD4+CD45RO+CD27+                      | CD8-CD4+              |
| <i>Effector CD8 T cells</i>                    | CD8Eff              | CD4-CD8+CD28+                             | CD4-CD8+              |
| <i>Memory CD8 T cells</i>                      | CD8Mem              | CD4-CD8+CD28-                             | CD4-CD8+              |
| <i>T<sub>regs</sub></i>                        | T <sub>REG</sub> -1 | CD3+CD8-CD4+CD25+CD127low                 | CD3+CD8-CD4+          |
| <i>Active T<sub>regs</sub>_1</i>               | T <sub>REG</sub> -2 | CD3+CD8-<br>CD4+CD25+CD127lowCCR4+CD45RA- | CD3+CD8-CD4+          |
| <i>Total T cells</i>                           | Tcell               | CD3+                                      | Singlets              |
| <i>CD4 T cells</i>                             | CD4Tcell            | CD3+CD8-CD4+                              | CD3+                  |
| <i>Exhausted CD4 T cells_1</i>                 | CD4Texh-1           | CD3+CD8-CD4+PD1+CD57-                     | CD3+CD8-CD4+          |
| <i>Exhausted CD4 T cells_2</i>                 | CD4Texh-2           | CD3+CD8-CD4+PD1+CD57-KLRG1+               | CD3+CD8-CD4+PD1+CD57- |
| <i>Anergic CD4 T cells_1</i>                   | CD4Tan-1            | CD3+CD8-CD4+PD1+CD57-KLRG1-               | CD3+CD8-CD4+PD1+CD57- |
| <i>Senescent CD4 T cells_1</i>                 | CD4Tsen-1           | CD3+CD8-CD4+PD1-CD57+KLRG1+               | CD3+CD8-CD4+PD1-CD57+ |
| <i>CD8 T cells</i>                             | CD8Tcell            | CD3+CD4-CD8+                              | CD3+                  |
| <i>Exhausted CD8 T cells_1</i>                 | CD8Texh-1           | CD3+CD4-CD8+PD1+CD57-                     | CD3+CD4-CD8+          |
| <i>Exhausted CD8 T cells_2</i>                 | CD8Texh-2           | CD3+CD4-CD8+PD1+CD57-KLRG1+               | CD3+CD4-CD8+PD1+CD57- |
| <i>Anergic CD8 T cells_1</i>                   | CD8Tan-1            | CD3+CD4-CD8+PD1+CD57-KLRG1-               | CD3+CD4-CD8+PD1+CD57- |
| <i>Senescent CD8 T cells_1</i>                 |                     | CD3+CD4-CD8+PD1+CD57+                     | CD3+CD4-CD8+PD1-CD57+ |
| <i>Exhausted CD4 T cells_3</i>                 | CD4Texh-3           | CD3+CD8-CD4+PD1+CD57-KLRG+                | CD3+CD8-CD4+          |
| <i>Anergic CD4 T cells_2</i>                   | CD4Tan-2            | CD3+CD8-CD4+PD1+CD57-KLRG1-               | CD3+CD8-CD4+          |
| <i>Senescent CD4 T cells_2</i>                 | CD4Tsen-2           | CD3+CD8-CD4+PD1-CD57+KLRG1+               | CD3+CD8-CD4+          |
| <i>Exhausted CD8 T cells_3</i>                 | CD8Texh-3           | CD3+CD4-CD8+PD1+CD57-KLRG1+               | CD3+CD4-CD8+          |
| <i>Anergic CD8 T cells_2</i>                   | CD8Tan-2            | CD3+CD4-CD8+PD1+CD57-KLRG1-               | CD3+CD4-CD8+          |
| <i>Senescent CD8 T cells_2</i>                 | CD8Tsen             | CD3+CD4-CD8+PD1-CD57+KLRG1+               | CD3+CD4-CD8+          |
| <i>Total TFH cells</i>                         | Tfh                 | CD8-CD4+CXCR5+PD1+                        | CD8-CD4+              |
| <i>TFH17</i>                                   | Tfh17               | CD8-CD4+CXCR5+PD1+CCR6+CXCR3-             | CD8-CD4+              |
| <i>TFH1</i>                                    | Tfh1                | CD8-CD4+CXCR5+PD1+CCR6-CXCR3+             | CD8-CD4+              |
| <i>TFH2</i>                                    | Tfh2                | CD8-CD4+CXCR5+ PD1+CCR6-CXCR3-            | CD8-CD4+              |
| <i>IL17+ CD4 T cells</i>                       | Th17                | CD8-CD4+IL17+                             | CD8-CD4+              |
| <i>IFN<math>\gamma</math>+ CD4 T cells</i>     | Th1                 | CD8-CD4+IFN $\gamma$ +IL4-                | CD8-CD4+              |
| <i>IFN<math>\gamma</math>+IL4+ CD4 T cells</i> | IFN $\gamma$ IL4CD4 | CD8-CD4+IFN $\gamma$ +IL4+                | CD8-CD4+              |
| <i>IL4+ CD4 T cells</i>                        | Th2                 | CD8-CD4+IFN $\gamma$ -IL4+                | CD8-CD4+              |
| <i>IL17+ CD8 T cells</i>                       | IL17CD8             | CD4-CD8+IL17+                             | CD4-CD8+              |

|                                                |                     |                                           |                              |
|------------------------------------------------|---------------------|-------------------------------------------|------------------------------|
| <i>IFN<math>\gamma</math>+ CD8 T cells</i>     | IFNgBD8             | CD4-CD8+IFN $\gamma$ +IL4-                | CD4-CD8+                     |
| <i>IFN<math>\gamma</math>+IL4+ CD8 T cells</i> | IFNgIL4CD8          | CD4-CD8+IFN $\gamma$ +IL4+                | CD4-CD8+                     |
| <i>IL4+ CD8 T cells</i>                        | IL4CD8              | CD4-CD8+IFN $\gamma$ -IL4+                | CD4-CD8+                     |
| <i>Active T<sub>regs_2</sub></i>               | T <sub>REG</sub> -3 | CD3+CD8-CD4+CCR4+CD45RA-<br>CD25+CD127low | CD3+CD8-<br>CD4+CCR4+CD45RA- |
| <i>Naïve CD4 T cells_2</i>                     | NaiveCD4-2          | CD8-CD4+CD45RA+CD45RO-CD27+               | CD8-CD4+                     |
| <i>Naïve CD8 T cells</i>                       | NaiveCD8            | CD4-CD8+CD45RA+CD45RO -CD27+              | CD4-CD8+                     |

**Supplementary Table S2. Analyzed cytokines and chemokines.**

| <b>Cytokine/Chemokine<br/>(pg/ml)</b> | <b>MN<br/>(n = 19)</b> | <b>HC<br/>(n = 8)</b> |
|---------------------------------------|------------------------|-----------------------|
| CD40L                                 | ND                     | ND                    |
| G-CSF/CSF-3                           | ND                     | ND                    |
| GM-CSF                                | ND                     | ND                    |
| IFN-g                                 | ND                     | ND                    |
| IL-1 $\beta$                          | ND                     | ND                    |
| IL-10                                 | ND                     | ND                    |
| IL-12p70                              | ND                     | ND                    |
| IL-13                                 | ND                     | ND                    |
| IL-17A                                | ND                     | ND                    |
| IL-2                                  | ND                     | ND                    |
| IL-4                                  | ND                     | ND                    |
| IL-5                                  | ND                     | ND                    |
| IL-6                                  | ND                     | ND                    |
| IL-7                                  | 0.64 $\pm$ 0.40        | 0.31 $\pm$ 0.28       |
| IL-8                                  | ND                     | ND                    |
| MCP-1                                 | 22.10 $\pm$ 13.16      | 21.45 $\pm$ 7.74      |
| MIP-1 $\beta$                         | ND                     | ND                    |
| TNF- $\alpha$                         | 0.03 $\pm$ 0.01*       | 0.02 $\pm$ 0.00       |
| TNF- $\beta$                          | ND                     | ND                    |

ND = not detectable in over 90% of samples. \* $P < 0.05$ .

**Supplementary Table S3. PhIP-seq results.** Detected antibody specificities for each sample (1=hit detected, 0=no hit detected) with association tests for enrichment in the MN, CKD, or HC groups (first sheet). Also shown are association tests for hits grouped by gene, protein, or viral taxon (second sheet). Association tests were performed using Fisher's exact test and the false discovery rate was controlled using the Benjamini/Hochberg procedure (see **Supplemental spreadsheet**).

*Supplementary information is available at KI Report's website.*



# SUPPLEMENTAL FIGURES

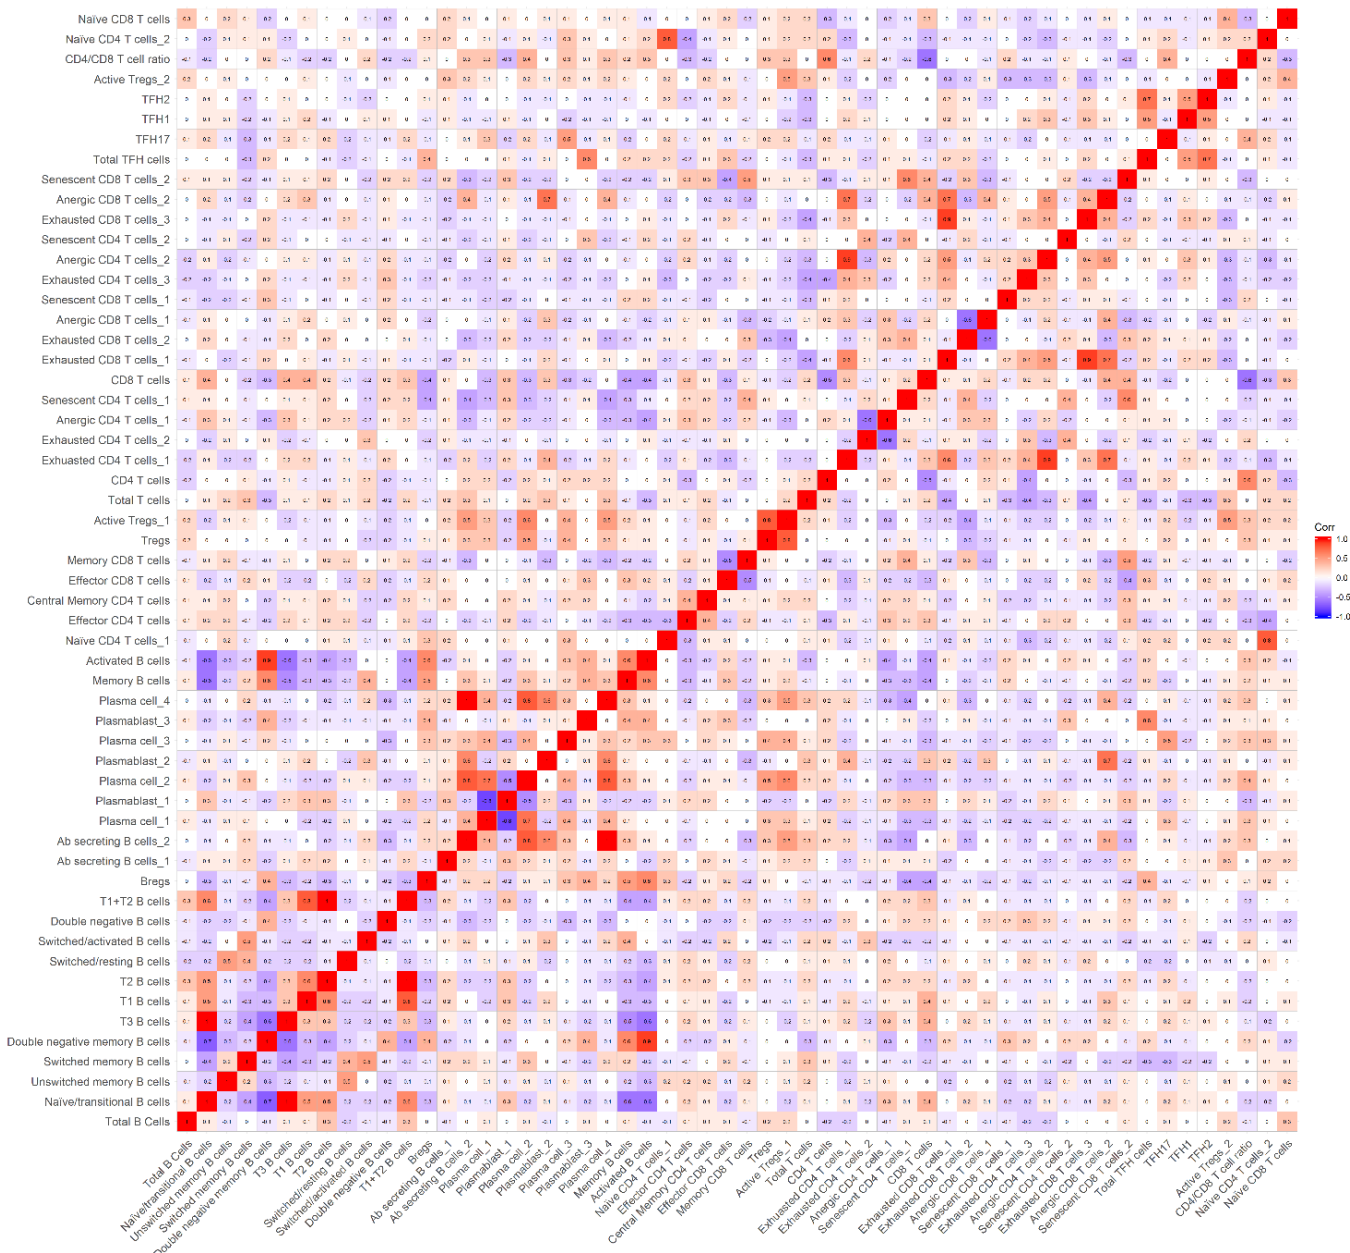

Supplementary Figure S1. Correlation plot of the 52 cell subsets in 71 patients with complete data (30 MN, 31 CKD, 10 HC).

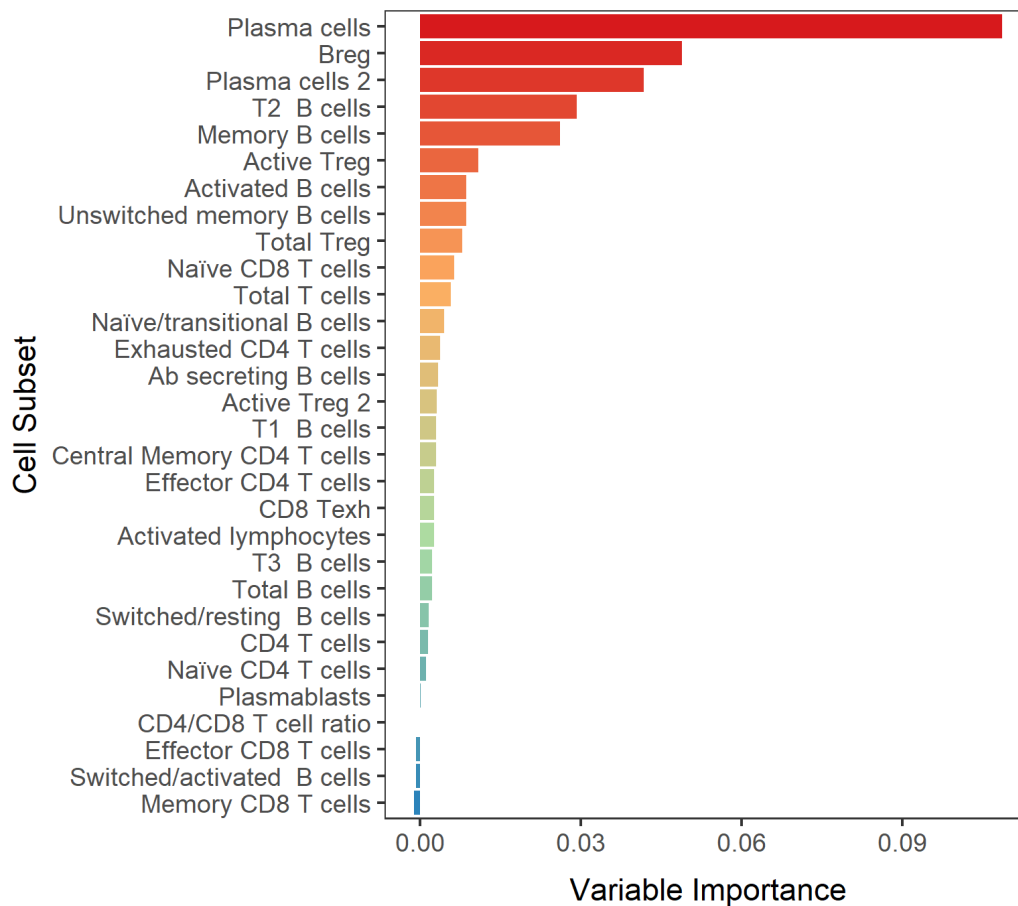

**Supplementary Figure S2. Variable importance from random forest analysis.** A large Variable IMPortance (VIMP) value for a cell subset indicates that misspecification of that variable decreases ability in the forest in distinguishing between subjects with membranous nephropathy and the other two conditions, based on the cell subsets. VIMP close to zero indicates that the cell subset contributes nothing to distinguishing between groups, and negative values indicate that the ability to distinguishing between groups improves when the cell subset is misdefined. In the latter case, we assume noise is more informative than the true cell subset. As such, if we ignore cell subsets with negative and near zero values of VIMP, we are left mostly with B cell subsets. Among them, plasma cells and B<sub>REG</sub> had the largest VIMP.

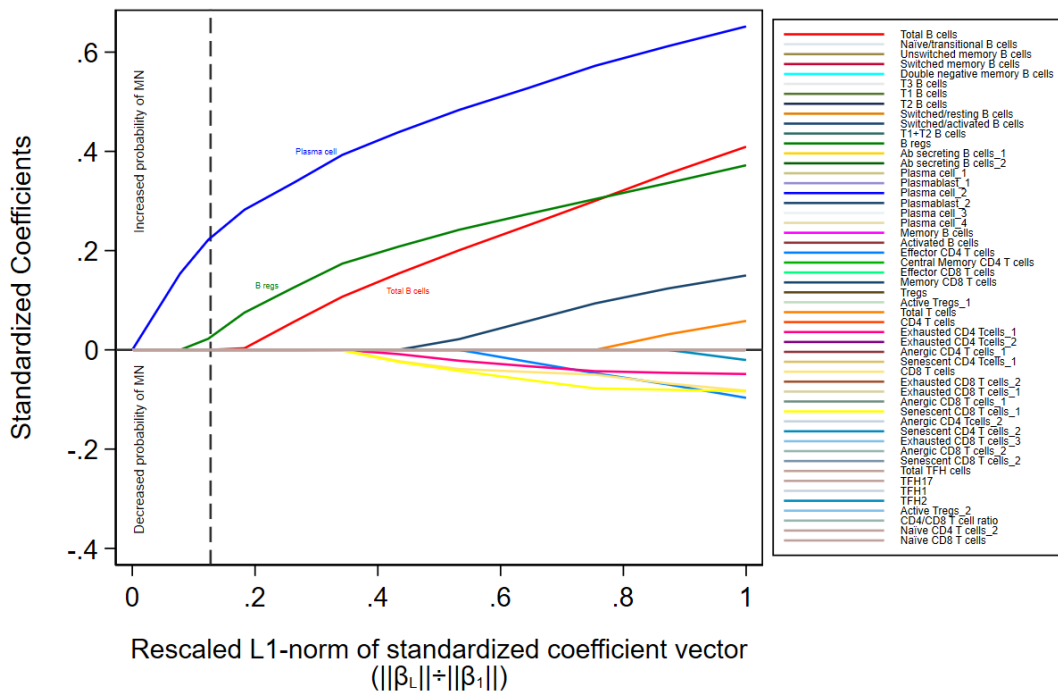

**Supplementary Figure S3. LASSO for variable selection.** Standardized coefficient estimates as a function of the tuning parameter which “shrinks” the coefficient towards zero as its value (on x-axis) gets larger; by setting some coefficient to zero, the tuning parameter determines which variables the LASSO will eventually exclude. Plasma cells and B<sub>REG</sub> had the largest standardized coefficients and would have been selected (along with B cells) as the only significant cell subsets had the tuning parameter been set to the level of the vertical dotted line.

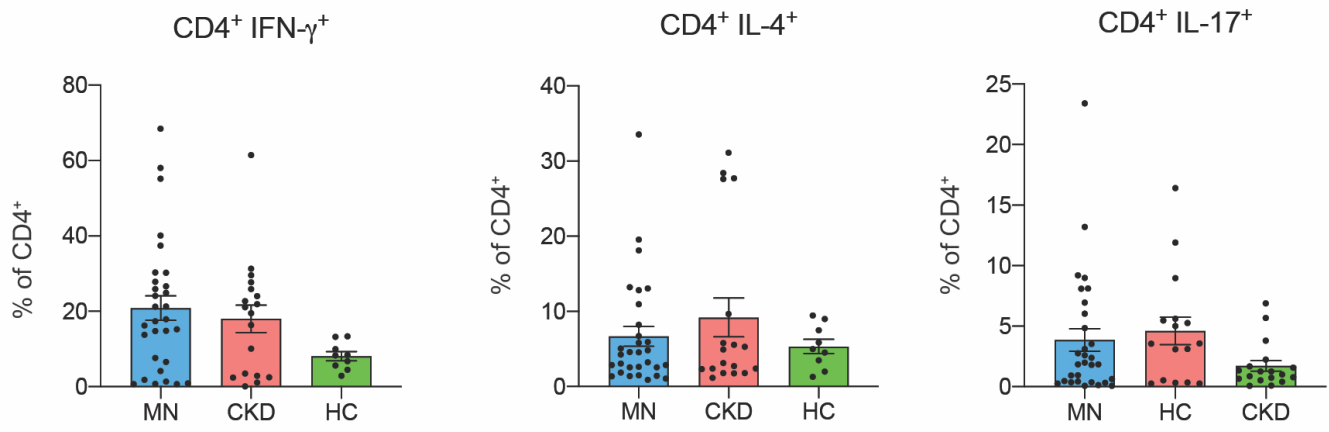

**Supplementary Figure S4. IFN-g<sup>+</sup>, IL-4<sup>+</sup>, and IL-17<sup>+</sup> CD4<sup>+</sup> T cell subsets in MN, CKD patients and healthy controls (HC).** Data are presented as mean  $\pm$  SD. Each dot represents the value for a single patient.

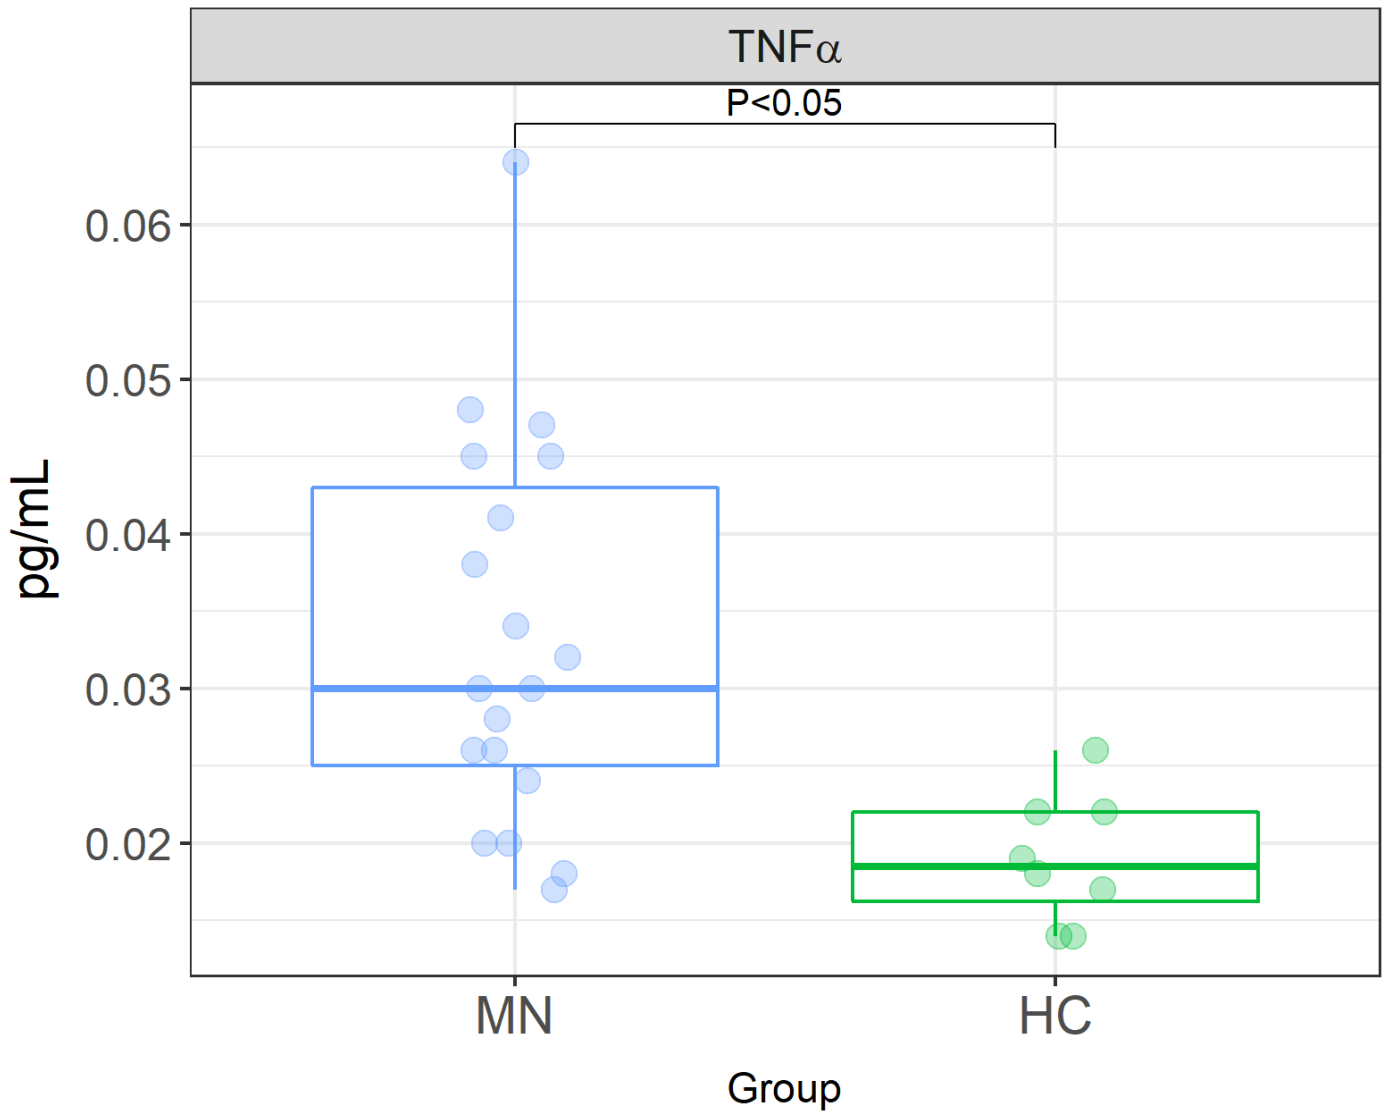

**Supplementary Figure S5. Serum levels of TNF- $\alpha$ .** Serum levels of TNF- $\alpha$  in patients with membranous nephropathy (MN) and in healthy controls (HC). Data are presented as mean  $\pm$  SD. Each dot represents the value for a single patient.  $P < 0.05$  by unpaired T-test and Holm-Bonferroni adjustment for multiple comparisons.
